# Supplementary material
Source: HighWire-hosted journal article supplement (http://ajnr-stage2.highwire.org/highwire/filestream/181906/field_highwire_adjunct_files/0/3599_table.pdf)
Supplement: 3599_table.pdf [file 3599_table.pdf]

On-line Table: MRI characteristics

| Patient | ASIA on Admit | ASIA on Follow-Up | Follow-Up Time | Continuous T2- Signal Abnormality | Levels Involved | Length of Continuous T2-Signal Abnormality | T1-Signal Intensity | Degree of T2-Hyperintensity | AP Diameter of Conus | Gadolinium Enhancement |
|---------|---------------|-------------------|----------------|-----------------------------------|-----------------|--------------------------------------------|---------------------|-----------------------------|----------------------|------------------------|
| 1       | B             | B                 | 7 d            | T10 to conus                      | 6 Levels        | 16 cm                                      | Normal              | Severe                      | 10 mm                | Trace                  |
| 2       | D             | E                 | 3 d            | T9 to conus                       | 4 Levels        | 11 cm                                      | Normal              | Mild                        | 10 mm                | ND                     |
| 3       | E             | E                 | 1 d            | T9 to conus                       | 4 Levels        | 12 cm                                      | Normal              | Mild                        | 9 mm                 | None                   |
| 4       | B             | B                 | 6 d            | T6 to conus                       | 7 Levels        | 17 cm                                      | Normal              | Mild                        | 8 mm                 | Trace                  |
| 5       | D             | D                 | 10 d           | T10 to conus                      | 4 Levels        | 11 cm                                      | Normal              | Moderate                    | 8 mm                 | None                   |
| 6       | D             | E                 | 15 d           | T7 to conus                       | 6 Levels        | 17 cm                                      | Normal              | Mild                        | 8 mm                 | ND                     |
| 7       | C             | E                 | 8 y            | T9 to conus                       | 4 Levels        | 12 cm                                      | Normal              | Mild                        | 7 mm                 | None                   |
| 8       | D             | NA                | NA             | T5 to conus                       | 7.5 Levels      | 21 cm                                      | Normal              | Moderate                    | 8 mm                 | ND                     |
| 9       | C             | D                 | 6 d            | T5 to conus                       | 7 Levels        | 18 cm                                      | Normal              | Moderate                    | 9 mm                 | ND                     |
| 10      | C             | C                 | 19 d           | T6 to conus                       | 7 Levels        | 18 cm                                      | Normal              | Mild                        | 8 mm                 | ND                     |
| 11      | A             | A                 | 12 d           | T9 to conus                       | 6 Levels        | 14 cm                                      | Normal              | Moderate                    | 7 mm                 | None                   |
| 12      | D             | D                 | 4 d            | T10 to conus                      | 3 Levels        | 10 cm                                      | Normal              | Severe                      | 8 mm                 | ND                     |
| 13      | A             | A                 | 6 d            | T10 to conus                      | 6 Levels        | 14 cm                                      | Normal              | Severe                      | 10 mm                | Trace                  |
| 14      | B             | NA                | NA             | T9 to conus                       | 3 Levels        | 9.5 cm                                     | Normal              | Severe                      | 9 mm                 | ND                     |
| 15      | A             | A                 | 14 d           | T9 to conus                       | 5 Levels        | 13 cm                                      | Normal              | Severe                      | 8 mm                 | ND                     |
| 16      | A             | A                 | 5 d            | T8 to conus                       | 6 Levels        | 16 cm                                      | Normal              | Severe                      | 8 mm                 | None                   |
| 17      | A             | A                 | 7 d            | T9 to conus                       | 4 Levels        | 11 cm                                      | Normal              | Moderate                    | 9 mm                 | None                   |
| 18      | C             | C                 | 3 d            | T8 to conus                       | 5 Levels        | 13 cm                                      | Normal              | Moderate                    | 8 mm                 | ND                     |
| 19      | D             | D                 | 5 d            | T9 to conus                       | 4 Levels        | 11 cm                                      | Normal              | Severe                      | 8 mm                 | ND                     |
| 20      | D             | NA                | NA             | T8 to conus                       | 5 Levels        | 14 cm                                      | Normal              | Severe                      | 8.5 mm               | None                   |
| 21      | D             | E                 | 3 d            | T8 to conus                       | 6 Levels        | 16 cm                                      | Normal              | Moderate                    | 8 mm                 | Trace                  |
| 22      | D             | E                 | 2 d            | T8 to conus                       | 5 Levels        | 13 cm                                      | Normal              | Severe                      | —                    | ND                     |
| 23      | C             | C                 | 6 d            | T9 to conus                       | 3.5 Levels      | 9 cm                                       | Normal              | Severe                      | 9 mm                 | ND                     |

**Note:**—T2-signal abnormality on axial sections was located in the central cord. Cord expansion was present in all patients.

NA indicates not available; ND, not done; —, only sagittal sequences performed and AP diameter could not be measured.
